# Supplementary material for: Highly sensitive measurements of disease progression in rare disorders: Developing and validating a multimodal model of retinal degeneration in Stargardt disease
Source: PubMed Central journal article supplement (PMC5371327; doi:10.1371/journal.pone.0174020), 2017-03-29
Supplement: pone.0174020.s001.pdf [file pone.0174020.s001.pdf]

**S1 Table. Current gene therapy trials for retinal dystrophies, including expected number of patients enrolled, timeframe and endpoints that assess efficacy.**

| NCT                      | Phase | Disease | Gene          | Patients | Timeframe (months) | Endpoints for efficacy                                                                                      |
|--------------------------|-------|---------|---------------|----------|--------------------|-------------------------------------------------------------------------------------------------------------|
| <a href="#">01494805</a> | I/II  | AMD     | <i>sFLT01</i> | 40       | 36                 | BCVA, CNV lesion, foveal thickness                                                                          |
| <a href="#">01301443</a> | I     | AMD     | -             | 21       | 0,5                | OCT                                                                                                         |
| <a href="#">01024998</a> | I     | AMD     | <i>sFLT01</i> | 34       | 12                 | Decreased retinal thickness                                                                                 |
| <a href="#">02341807</a> | I/II  | CHM     | <i>CHM</i>    | 10       | 24                 | Visual function                                                                                             |
| <a href="#">02077361</a> | I     | CHM     | <i>CHM</i>    | 6        | 24                 | Visual field, visual function                                                                               |
| <a href="#">01461213</a> | I/II  | CHM     | <i>CHM</i>    | 14       | 6                  | Visual acuity                                                                                               |
| <a href="#">01496040</a> | I/II  | LCA     | <i>RPE65</i>  | 9        | 12                 | ERG, patient questionnaire, visual acuity, color vision, pupillometry, microperimetry, dark adaptation      |
| <a href="#">00999609</a> | III   | LCA     | <i>RPE65</i>  | 24       | 12                 | Mobility testing                                                                                            |
| <a href="#">00821340</a> | I     | LCA     | <i>RPE65</i>  | 10       | 36                 | Visual function                                                                                             |
| <a href="#">00749957</a> | I/II  | LCA     | <i>RPE65</i>  | 12       | 24                 | Visual fields, visual acuity, ERG                                                                           |
| <a href="#">00643747</a> | I/II  | LCA     | <i>RPE65</i>  | 12       | 12                 | Visual function                                                                                             |
| <a href="#">00516477</a> | I     | LCA     | <i>RPE65</i>  | 12       | 60                 | Visual function                                                                                             |
| <a href="#">00481546</a> | I     | LCA     | <i>RPE65</i>  | 15       | 180                | Visual function                                                                                             |
| <a href="#">01482195</a> | I     | LCA     | <i>MERTK</i>  | 6        | 12                 | Visual function                                                                                             |
| <a href="#">01367444</a> | I/II  | STGD1   | <i>ABCA4</i>  | 46       | 12                 | Delay in retinal degeneration by BCVA, microperimetry, full-field static/kinetic perimetry, OCT and FAF     |
| <a href="#">02402660</a> | II    | STGD1   | <i>ABCA4</i>  | 50       | 24                 | Combination of changes in atrophic lesion size, best-corrected visual acuity (BCVA), and ocular assessments |
| <a href="#">01278277</a> | I/II  | STGD1   | <i>ABCA4</i>  | 30       | 6                  | Focal electroretinogram                                                                                     |
| <a href="#">01505062</a> | I/II  | USH1B   | <i>MYO7A</i>  | 18       | 12                 | Delay in retinal degeneration                                                                               |
| <a href="#">02317887</a> | I/IIa | XLRS    | <i>RS1</i>    | 24       | 18                 | Visual function, ERG, OCT, visual field                                                                     |

AMD = age-related macular degeneration, BCVA = best-corrected visual acuity, CHM = choroideremia, CNV = choroidal neovascularization, ERG = electroretinography, FAF = fundus autofluorescence, LCA = Leber's congenital amaurosis, NCT = national clinical trial, OCT = optical coherence tomography, STGD1 = Stargardt disease, USH1B = Usher Syndrome Type IB, XLRS = X-linked juvenile retinoschisis.
