# Supplementary material for: Highly sensitive measurements of disease progression in rare disorders: Developing and validating a multimodal model of retinal degeneration in Stargardt disease
Source: PubMed Central journal article supplement (PMC5371327; doi:10.1371/journal.pone.0174020), 2017-03-29
Supplement: pone.0174020.s004.pdf [file pone.0174020.s004.pdf]

```

/*
Syntax for "Weighting scores optimazation".
- Data first need to be transformed into changes from the baseline measurement in all
univariable biomarkers by retinal eccentricity (e).
- The macro is written for 5 biomarkers.
  1 = best-corrected visual acuity (delta_ecc_logmar)
  2 = questionably decreased autofluorescence (delta_ecc_qdaf)
  3 = definitely decreased autofluorescence (delta_ecc_ddaf)
  4 = transverse loss of the ellipsoid zone (delta_ecc_ez)
  5 = transverse loss of the external limiting membrane (delta_ecc_elm)
  composite (delta_ecc_comp)
- v: assigned weight by 5% steps
  w: relative weight of each biomarker
*/

```

```

options nonotes;
libname read 'location of the dataset';
data dataset;
set read.dataset;
run;
proc print data=dataset;
run;

```

```

/*
Start macro
*/

```

```

%macro weighting;
%let counter=1;
%do v1=0 %to 100 %by 5;
  %do v2=0 %to 100 %by 5;
    %do v3=0 %to 100 %by 5;
      %do v4=0 %to 100 %by 5;
        %do v5=0 %to 100 %by 5;
          %let sum = &v1 + &v2 + &v3 + &v4 + &v5;
          %if (&sum =100) %then %do;

```

```

data weighting;
set data;
  w1=.;
  w2=.;
  w3=.;
  w4=.;
  w5=.;

```

```

output;
run;

```

```

data weighting;
set weighting;
if (delta_ecc_logmar ne .) and (delta_ecc_qdaf ne .) and (delta_ecc_ddaf ne .) and (delta_ecc_ez
ne .) and (delta_ecc_elm ne .) then do;
  w1 = &v1/(&v1 + &v2 +&v3 +&v4 +&v5);
  w2 = &v2/(&v1 + &v2 +&v3 +&v4 +&v5);
  w3 = &v3/(&v1 + &v2 +&v3 +&v4 +&v5);
  w4 = &v4/(&v1 + &v2 +&v3 +&v4 +&v5);
  w5 = &v5/(&v1 + &v2 +&v3 +&v4 +&v5);
  delta_ecc_comp = w1*delta_ecc_logmar + w2*delta_ecc_qdaf + w3*delta_ecc_ddaf +
  w4*delta_ecc_ez + w5*delta_ecc_elm;
end;
if (delta_ecc_logmar=.) and (delta_ecc_qdaf ne .) and (delta_ecc_ddaf ne .) and (delta_ecc_ez ne
.) and (delta_ecc_elm ne .) then do;
  w2 = &v2/(&v2 +&v3 +&v4 +&v5);
  w3 = &v3/(&v2 +&v3 +&v4 +&v5);
  w4 = &v4/(&v2 +&v3 +&v4 +&v5);
  w5 = &v5/(&v2 +&v3 +&v4 +&v5);

```

```

delta_ecc_comp = w2*delta_ecc_qdaf + w3*delta_ecc_ddaf + w4*delta_ecc_ez + w5*delta_ecc_elm;
end;
if (delta_ecc_logmar ne .) and (delta_ecc_qdaf = .) and (delta_ecc_ddaf ne .) and (delta_ecc_ez
ne .) and (delta_ecc_elm ne .) then do;
w1 = &v1/(&v1 +&v3 +&v4 +&v5);
w3 = &v3/(&v1 +&v3 +&v4 +&v5);
w4 = &v4/(&v1 +&v3 +&v4 +&v5);
w5 = &v5/(&v1 +&v3 +&v4 +&v5);
delta_ecc_comp = w1*delta_ecc_logmar + w3*delta_ecc_ddaf + w4*delta_ecc_ez + w5*delta_ecc_elm;
end;
if (delta_ecc_logmar ne .) and (delta_ecc_qdaf ne .) and (delta_ecc_ddaf = .) and (delta_ecc_ez
ne .) and (delta_ecc_elm ne .) then do;
w1 = &v1/(&v1 + &v2 +&v4 +&v5);
w2 = &v2/(&v1 + &v2 +&v4 +&v5);
w4 = &v4/(&v1 + &v2 +&v4 +&v5);
w5 = &v5/(&v1 + &v2 +&v4 +&v5);
delta_ecc_comp = w1*delta_ecc_logmar + w2*delta_ecc_qdaf + w4*delta_ecc_ez + w5*delta_ecc_elm;
end;
if (delta_ecc_logmar ne .) and (delta_ecc_qdaf ne .) and (delta_ecc_ddaf ne .) and (delta_ecc_ez
= .) and (delta_ecc_elm ne .) then do;
w1 = &v1/(&v1 + &v2 +&v3 +&v5);
w2 = &v2/(&v1 + &v2 +&v3 +&v5);
w3 = &v3/(&v1 + &v2 +&v3 +&v5);
w5 = &v5/(&v1 + &v2 +&v3 +&v5);
delta_ecc_comp = w1*delta_ecc_logmar + w2*delta_ecc_qdaf + w3*delta_ecc_ddaf +
w5*delta_ecc_elm;
end;
if (delta_ecc_logmar ne .) and (delta_ecc_qdaf ne .) and (delta_ecc_ddaf ne .) and (delta_ecc_ez
ne .) and (delta_ecc_elm = .) then do;
w1 = &v1/(&v1 + &v2 +&v3 +&v4 );
w2 = &v2/(&v1 + &v2 +&v3 +&v4 );
w3 = &v3/(&v1 + &v2 +&v3 +&v4 );
w4 = &v4/(&v1 + &v2 +&v3 +&v4 );
delta_ecc_comp = w1*delta_ecc_logmar + w2*delta_ecc_qdaf + w3*delta_ecc_ddaf +
w4*delta_ecc_ez ;
end;
if (delta_ecc_logmar=..) and (delta_ecc_qdaf = .) and (delta_ecc_ddaf ne .) and (delta_ecc_ez ne
.) and (delta_ecc_elm ne .) then do;
w3 = &v3/(&v3 +&v4 +&v5);
w4 = &v4/(&v3 +&v4 +&v5);
w5 = &v5/(&v3 +&v4 +&v5);
delta_ecc_comp = w3*delta_ecc_ddaf + w4*delta_ecc_ez + w5*delta_ecc_elm;
end;
if (delta_ecc_logmar=..) and (delta_ecc_qdaf ne .) and (delta_ecc_ddaf = .) and (delta_ecc_ez ne
.) and (delta_ecc_elm ne .) then do;
w2 = &v2/(&v2 +&v4 +&v5);
w4 = &v4/(&v2 +&v4 +&v5);
w5 = &v5/(&v2 +&v4 +&v5);
delta_ecc_comp = w2*delta_ecc_qdaf + w4*delta_ecc_ez + w5*delta_ecc_elm;
end;
if (delta_ecc_logmar=..) and (delta_ecc_qdaf ne .) and (delta_ecc_ddaf ne .) and (delta_ecc_ez =
.) and (delta_ecc_elm ne .) then do;
w2 = &v2/(&v2 +&v3 +&v5);
w3 = &v3/(&v2 +&v3 +&v5);
w5 = &v5/(&v2 +&v3 +&v5);
delta_ecc_comp = w2*delta_ecc_qdaf + w3*delta_ecc_ddaf + w5*delta_ecc_elm;
end;
if (delta_ecc_logmar=..) and (delta_ecc_qdaf ne .) and (delta_ecc_ddaf ne .) and (delta_ecc_ez ne
.) and (delta_ecc_elm = .) then do;
w2 = &v2/(&v2 +&v3 +&v4 );
w3 = &v3/(&v2 +&v3 +&v4 );
w4 = &v4/(&v2 +&v3 +&v4 );
delta_ecc_comp = w2*delta_ecc_qdaf + w3*delta_ecc_ddaf + w4*delta_ecc_ez;
end;
if (delta_ecc_logmar ne .) and (delta_ecc_qdaf = .) and (delta_ecc_ddaf = .) and (delta_ecc_ez

```

```

ne .) and (delta_ecc_elm ne .) then do;
w1 = &v1/(&v1 +&v4 +&v5);
w4 = &v4/(&v1 +&v4 +&v5);
w5 = &v5/(&v1 +&v4 +&v5);
delta_ecc_comp = w1*delta_ecc_logmar + w4*delta_ecc_ez + w5*delta_ecc_elm;
end;
if (delta_ecc_logmar ne .) and (delta_ecc_qdaf = .) and (delta_ecc_ddaf ne .) and (delta_ecc_ez
= .) and (delta_ecc_elm ne .) then do;
w1 = &v1/(&v1 +&v3 +&v5);
w3 = &v3/(&v1 +&v3 +&v5);
w5 = &v5/(&v1 +&v3 +&v5);
delta_ecc_comp = w1*delta_ecc_logmar + w3*delta_ecc_ddaf + w5*delta_ecc_elm;
end;
if (delta_ecc_logmar ne .) and (delta_ecc_qdaf = .) and (delta_ecc_ddaf ne .) and (delta_ecc_ez
ne .) and (delta_ecc_elm = .) then do;
w1 = &v1/(&v1 +&v3 +&v4 );
w3 = &v3/(&v1 +&v3 +&v4 );
w4 = &v4/(&v1 +&v3 +&v4 );
delta_ecc_comp = w1*delta_ecc_logmar + w3*delta_ecc_ddaf + w4*delta_ecc_ez;
end;
if (delta_ecc_logmar ne .) and (delta_ecc_qdaf ne .) and (delta_ecc_ddaf = .) and (delta_ecc_ez
= .) and (delta_ecc_elm ne .) then do;
w1 = &v1/(&v1 + &v2 +&v5);
w2 = &v2/(&v1 + &v2 +&v5);
w5 = &v5/(&v1 + &v2 +&v5);
delta_ecc_comp = w1*delta_ecc_logmar + w2*delta_ecc_qdaf + w5*delta_ecc_elm;
end;
if (delta_ecc_logmar ne .) and (delta_ecc_qdaf ne .) and (delta_ecc_ddaf = .) and (delta_ecc_ez
ne .) and (delta_ecc_elm = .) then do;
w1 = &v1/(&v1 + &v2 +&v4);
w2 = &v2/(&v1 + &v2 +&v4);
w4 = &v4/(&v1 + &v2 +&v4);
delta_ecc_comp = w1*delta_ecc_logmar + w2*delta_ecc_qdaf + w4*delta_ecc_ez ;
end;
if (delta_ecc_logmar ne .) and (delta_ecc_qdaf ne .) and (delta_ecc_ddaf ne .) and (delta_ecc_ez
= .) and (delta_ecc_elm = .) then do;
w1 = &v1/(&v1 + &v2 +&v3 );
w2 = &v2/(&v1 + &v2 +&v3 );
w3 = &v3/(&v1 + &v2 +&v3 );
delta_ecc_comp = w1*delta_ecc_logmar + w2*delta_ecc_qdaf + w3*delta_ecc_ddaf ;
end;
if (delta_ecc_logmar ne .) and (delta_ecc_qdaf ne .) and (delta_ecc_ddaf = .) and (delta_ecc_ez
= .) and (delta_ecc_elm = .) then do;
w1 = &v1/(&v1 + &v2 );
w2 = &v2/(&v1 + &v2 );
delta_ecc_comp = w1*delta_ecc_logmar + w2*delta_ecc_qdaf ;
end;
if (delta_ecc_logmar ne .) and (delta_ecc_qdaf = .) and (delta_ecc_ddaf ne .) and (delta_ecc_ez
= .) and (delta_ecc_elm = .) then do;
w1 = &v1/(&v1 +&v3 );
w3 = &v3/(&v1 +&v3 );
delta_ecc_comp = w1*delta_ecc_logmar + w3*delta_ecc_ddaf;
end;
if (delta_ecc_logmar ne .) and (delta_ecc_qdaf = .) and (delta_ecc_ddaf = .) and (delta_ecc_ez
ne .) and (delta_ecc_elm = .) then do;
w1 = &v1/(&v1 + &v4 );
w4 = &v4/(&v1 + &v4 );
delta_ecc_comp = w1*delta_ecc_logmar + w4*delta_ecc_ez;
end;
if (delta_ecc_logmar ne .) and (delta_ecc_qdaf = .) and (delta_ecc_ddaf = .) and (delta_ecc_ez =
.) and (delta_ecc_elm ne .) then do;
w1 = &v1/(&v1 + &v5);
w5 = &v5/(&v1 + &v5);
delta_ecc_comp = w1*delta_ecc_logmar + w5*delta_ecc_elm;
end;

```

```

if (delta_ecc_logmar =.) and (delta_ecc_qdaf ne .) and (delta_ecc_ddaf ne .) and (delta_ecc_ez =
.) and (delta_ecc_elm = .) then do;
  w2 = &v2/( &v2 +&v3 );
  w3 = &v3/(&v2 +&v3 );
  delta_ecc_comp = w2*delta_ecc_qdaf + w3*delta_ecc_ddaf;
end;
if (delta_ecc_logmar =.) and (delta_ecc_qdaf ne .) and (delta_ecc_ddaf = .) and (delta_ecc_ez ne
.) and (delta_ecc_elm = .) then do;
  w2 = &v2/( &v2 +&v4 );
  w4 = &v4/( &v2 +&v4 );
  delta_ecc_comp = w2*delta_ecc_qdaf + w4*delta_ecc_ez ;
end;
if (delta_ecc_logmar =.) and (delta_ecc_qdaf ne .) and (delta_ecc_ddaf = .) and (delta_ecc_ez =
.) and (delta_ecc_elm ne .) then do;
  w2 = &v2/(&v2 +&v5);
  w5 = &v5/(&v2 +&v5);
  delta_ecc_comp = w2*delta_ecc_qdaf + w5*delta_ecc_elm;
end;
if (delta_ecc_logmar =.) and (delta_ecc_qdaf = .) and (delta_ecc_ddaf ne .) and (delta_ecc_ez ne
.) and (delta_ecc_elm = .) then do;
  w3 = &v3/(&v3 +&v4 );
  w4 = &v4/(&v3 +&v4);
  delta_ecc_comp = w3*delta_ecc_ddaf + w4*delta_ecc_ez ;
end;
if (delta_ecc_logmar=.) and (delta_ecc_qdaf = .) and (delta_ecc_ddaf ne .) and (delta_ecc_ez =
.) and (delta_ecc_elm ne .) then do;
  w3 = &v3/(&v3 +&v5);
  w5 = &v5/(&v3 +&v5);
  delta_ecc_comp = w3*delta_ecc_ddaf + w5*delta_ecc_elm;
end;
if (delta_ecc_logmar=.) and (delta_ecc_qdaf = .) and (delta_ecc_ddaf = .) and (delta_ecc_ez ne
.) and (delta_ecc_elm ne .) then do;
  w4 = &v4/(&v4 +&v5);
  w5 = &v5/(&v4 +&v5);
  delta_ecc_comp = w4*delta_ecc_ez + w5*delta_ecc_elm;
end;
if (delta_ecc_logmar ne .) and (delta_ecc_qdaf = .) and (delta_ecc_ddaf = .) and (delta_ecc_ez =
.) and (delta_ecc_elm = .) then do;
  delta_ecc_comp = delta_ecc_logmar;
end;

if (delta_ecc_logmar =.) and (delta_ecc_qdaf ne .) and (delta_ecc_ddaf = .) and (delta_ecc_ez =
.) and (delta_ecc_elm = .) then do;
  delta_ecc_comp = delta_ecc_qdaf;
end;
if (delta_ecc_logmar =.) and (delta_ecc_qdaf = .) and (delta_ecc_ddaf ne .) and (delta_ecc_ez =
.) and (delta_ecc_elm = .) then do;
  delta_ecc_comp = delta_ecc_ddaf;
end;
if (delta_ecc_logmar =.) and (delta_ecc_qdaf = .) and (delta_ecc_ddaf = .) and (delta_ecc_ez ne
.) and (delta_ecc_elm = .) then do;
  delta_ecc_comp = delta_ecc_ez;
end;
if (delta_ecc_logmar =.) and (delta_ecc_qdaf = .) and (delta_ecc_ddaf = .) and (delta_ecc_ez =
.) and (delta_ecc_elm ne .) then do;
  delta_ecc_comp = delta_ecc_elm;
end;
output;
run;
proc datasets library=work;
  delete sf si sfi;
run;
ods select none;
proc mixed data=weighting method=reml maxiter=100000 covtest ;
Class patient_id eye;

```

```

Model delta_ecc_comp = delta_date_diff / noint outpm=predmeans_std outp=predind_std solution;
Random delta_date_diff*patient_id delta_date_diff*patient_id(eye) /type=vc;
where delta_ecc_comp ne 0;
ods output solutionf=sf (rename=(estimate=slope)) covparms=si (rename=(estimate=residual));
run;
ods _all_ close;

    %if %sysfunc(exist(sf)) %then %do;

data sf;
set sf;
record=1;
keep record slope;
run;

data si;
set si;
record=1;
if covparm='residual';
keep record residual;
run;

data sfi;
merge sf si; by record;
msdr = slope/sqrt(residual);
run;

%if (&counter=1) %then %do;
    Data results_tot;
    set sfi;
    v1 = &v1; v2 = &v2; v3 = &v3; v4 = &v4; v5 = &v5;
    run;
%end;
%if (&counter>1) %then %do;
    Data results;
    set sfi;
    v1 = &v1; v2 = &v2; v3 = &v3; v4 = &v4; v5 = &v5;
    run;
    data results_tot;
    set results_tot results;
    run;
%end;
%let counter = &counter +1;

%end;

    %end;
%end;
%end;
%end;
%end;
%end;
%end;
%mend;
/*
End of macro
*/

%weighting;
run;

data read.results_tot;
set results_tot;
run;

```

```
ods output;  
proc print data=read.results_tot;  
run;
```
