# Supplementary material for: Highly sensitive measurements of disease progression in rare disorders: Developing and validating a multimodal model of retinal degeneration in Stargardt disease
Source: PubMed Central journal article supplement (PMC5371327; doi:10.1371/journal.pone.0174020), 2017-03-29
Supplement: pone.0174020.s005.pdf [file pone.0174020.s005.pdf]

```

/*
Syntax for the trial simulations.
*/

options nonotes;
libname read 'location of the dataset';
data weighting;
set read.dataset;
/*
Set the weights for v1...v5.
*/
v1=0;
v2=25;
v3=5;
v4=55;
v5=15;
w1=. ;
w2=. ;
w3=. ;
w4=. ;
w5=. ;

output;
run;

data weighting;
set weighting;
if (delta_ecc_logmar ne .) and (delta_ecc_qdaf ne .) and (delta_ecc_ddaf ne .) and (delta_ecc_ez
ne .) and (delta_ecc_elm ne .) then do;
w1 = v1/(v1 + v2 +v3 +v4 +v5);
w2 = v2/(v1 + v2 +v3 +v4 +v5);
w3 = v3/(v1 + v2 +v3 +v4 +v5);
w4 = v4/(v1 + v2 +v3 +v4 +v5);
w5 = v5/(v1 + v2 +v3 +v4 +v5);
delta_ecc_comp = w1*delta_ecc_logmar + w2*delta_ecc_qdaf + w3*delta_ecc_ddaf +
w4*delta_ecc_ez + w5*delta_ecc_elm;
end;
if (delta_ecc_logmar=. ) and (delta_ecc_qdaf ne .) and (delta_ecc_ddaf ne .) and (delta_ecc_ez ne
.) and (delta_ecc_elm ne .) then do;
w2 = v2/(v2 +v3 +v4 +v5);
w3 = v3/(v2 +v3 +v4 +v5);
w4 = v4/(v2 +v3 +v4 +v5);
w5 = v5/(v2 +v3 +v4 +v5);
delta_ecc_comp = w2*delta_ecc_qdaf + w3*delta_ecc_ddaf + w4*delta_ecc_ez + w5*delta_ecc_elm;
end;
if (delta_ecc_logmar ne .) and (delta_ecc_qdaf = .) and (delta_ecc_ddaf ne .) and (delta_ecc_ez
ne .) and (delta_ecc_elm ne .) then do;
w1 = v1/(v1 +v3 +v4 +v5);
w3 = v3/(v1 +v3 +v4 +v5);
w4 = v4/(v1 +v3 +v4 +v5);
w5 = v5/(v1 +v3 +v4 +v5);
delta_ecc_comp = w1*delta_ecc_logmar + w3*delta_ecc_ddaf + w4*delta_ecc_ez + w5*delta_ecc_elm;
end;
if (delta_ecc_logmar ne .) and (delta_ecc_qdaf ne .) and (delta_ecc_ddaf = .) and (delta_ecc_ez
ne .) and (delta_ecc_elm ne .) then do;
w1 = v1/(v1 + v2 +v4 +v5);
w2 = v2/(v1 + v2 +v4 +v5);
w4 = v4/(v1 + v2 +v4 +v5);
w5 = v5/(v1 + v2 +v4 +v5);
delta_ecc_comp = w1*delta_ecc_logmar + w2*delta_ecc_qdaf + w4*delta_ecc_ez + w5*delta_ecc_elm;
end;
if (delta_ecc_logmar ne .) and (delta_ecc_qdaf ne .) and (delta_ecc_ddaf ne .) and (delta_ecc_ez
= .) and (delta_ecc_elm ne .) then do;
w1 = v1/(v1 + v2 +v3 +v5);
w2 = v2/(v1 + v2 +v3 +v5);
w3 = v3/(v1 + v2 +v3 +v5);

```

```

w5 = v5/(v1 + v2 +v3 +v5);
delta_ecc_comp = w1*delta_ecc_logmar + w2*delta_ecc_qdaf + w3*delta_ecc_ddaf +
w5*delta_ecc_elm;
end;
if (delta_ecc_logmar ne .) and (delta_ecc_qdaf ne .) and (delta_ecc_ddaf ne .) and (delta_ecc_ez
ne .) and (delta_ecc_elm = .) then do;
w1 = v1/(v1 + v2 +v3 +v4 );
w2 = v2/(v1 + v2 +v3 +v4 );
w3 = v3/(v1 + v2 +v3 +v4 );
w4 = v4/(v1 + v2 +v3 +v4 );
delta_ecc_comp = w1*delta_ecc_logmar + w2*delta_ecc_qdaf + w3*delta_ecc_ddaf +
w4*delta_ecc_ez ;
end;
if (delta_ecc_logmar=..) and (delta_ecc_qdaf = .) and (delta_ecc_ddaf ne .) and (delta_ecc_ez ne
.) and (delta_ecc_elm ne .) then do;
w3 = v3/(v3 +v4 +v5);
w4 = v4/(v3 +v4 +v5);
w5 = v5/(v3 +v4 +v5);
delta_ecc_comp = w3*delta_ecc_ddaf + w4*delta_ecc_ez + w5*delta_ecc_elm;
end;
if (delta_ecc_logmar=..) and (delta_ecc_qdaf ne .) and (delta_ecc_ddaf = .) and (delta_ecc_ez ne
.) and (delta_ecc_elm ne .) then do;
w2 = v2/(v2 +v4 +v5);
w4 = v4/(v2 +v4 +v5);
w5 = v5/(v2 +v4 +v5);
delta_ecc_comp = w2*delta_ecc_qdaf + w4*delta_ecc_ez + w5*delta_ecc_elm;
end;
if (delta_ecc_logmar=..) and (delta_ecc_qdaf ne .) and (delta_ecc_ddaf ne .) and (delta_ecc_ez =
.) and (delta_ecc_elm ne .) then do;
w2 = v2/(v2 +v3 +v5);
w3 = v3/(v2 +v3 +v5);
w5 = v5/(v2 +v3 +v5);
delta_ecc_comp = w2*delta_ecc_qdaf + w3*delta_ecc_ddaf + w5*delta_ecc_elm;
end;
if (delta_ecc_logmar=..) and (delta_ecc_qdaf ne .) and (delta_ecc_ddaf ne .) and (delta_ecc_ez ne
.) and (delta_ecc_elm = .) then do;
w2 = v2/(v2 +v3 +v4 );
w3 = v3/(v2 +v3 +v4 );
w4 = v4/(v2 +v3 +v4 );
delta_ecc_comp = w2*delta_ecc_qdaf + w3*delta_ecc_ddaf + w4*delta_ecc_ez;
end;
if (delta_ecc_logmar ne .) and (delta_ecc_qdaf = .) and (delta_ecc_ddaf = .) and (delta_ecc_ez
ne .) and (delta_ecc_elm ne .) then do;
w1 = v1/(v1 +v4 +v5);
w4 = v4/(v1 +v4 +v5);
w5 = v5/(v1 +v4 +v5);
delta_ecc_comp = w1*delta_ecc_logmar + w4*delta_ecc_ez + w5*delta_ecc_elm;
end;
if (delta_ecc_logmar ne .) and (delta_ecc_qdaf = .) and (delta_ecc_ddaf ne .) and (delta_ecc_ez
= .) and (delta_ecc_elm ne .) then do;
w1 = v1/(v1 +v3 +v5);
w3 = v3/(v1 +v3 +v5);
w5 = v5/(v1 +v3 +v5);
delta_ecc_comp = w1*delta_ecc_logmar + w3*delta_ecc_ddaf + w5*delta_ecc_elm;
end;
if (delta_ecc_logmar ne .) and (delta_ecc_qdaf = .) and (delta_ecc_ddaf ne .) and (delta_ecc_ez
ne .) and (delta_ecc_elm = .) then do;
w1 = v1/(v1 +v3 +v4 );
w3 = v3/(v1 +v3 +v4 );
w4 = v4/(v1 +v3 +v4 );
delta_ecc_comp = w1*delta_ecc_logmar + w3*delta_ecc_ddaf + w4*delta_ecc_ez;
end;
if (delta_ecc_logmar ne .) and (delta_ecc_qdaf ne .) and (delta_ecc_ddaf = .) and (delta_ecc_ez
= .) and (delta_ecc_elm ne .) then do;
w1 = v1/(v1 + v2 +v5);

```

```

w2 = v2/(v1 + v2 +v5);
w5 = v5/(v1 + v2 +v5);
delta_ecc_comp = w1*delta_ecc_logmar + w2*delta_ecc_qdaf + w5*delta_ecc_elm;
end;
if (delta_ecc_logmar ne .) and (delta_ecc_qdaf ne .) and (delta_ecc_ddaf = .) and (delta_ecc_ez
ne .) and (delta_ecc_elm = .) then do;
w1 = v1/(v1 + v2 +v4);
w2 = v2/(v1 + v2 +v4);
w4 = v4/(v1 + v2 +v4);
delta_ecc_comp = w1*delta_ecc_logmar + w2*delta_ecc_qdaf + w4*delta_ecc_ez ;
end;
if (delta_ecc_logmar ne .) and (delta_ecc_qdaf ne .) and (delta_ecc_ddaf ne .) and (delta_ecc_ez
= .) and (delta_ecc_elm = .) then do;
w1 = v1/(v1 + v2 +v3 );
w2 = v2/(v1 + v2 +v3 );
w3 = v3/(v1 + v2 +v3 );
delta_ecc_comp = w1*delta_ecc_logmar + w2*delta_ecc_qdaf + w3*delta_ecc_ddaf ;
end;
if (delta_ecc_logmar ne .) and (delta_ecc_qdaf ne .) and (delta_ecc_ddaf = .) and (delta_ecc_ez
= .) and (delta_ecc_elm = .) then do;
w1 = v1/(v1 + v2 );
w2 = v2/(v1 + v2 );
delta_ecc_comp = w1*delta_ecc_logmar + w2*delta_ecc_qdaf ;
end;
if (delta_ecc_logmar ne .) and (delta_ecc_qdaf = .) and (delta_ecc_ddaf ne .) and (delta_ecc_ez
= .) and (delta_ecc_elm = .) then do;
w1 = v1/(v1 +v3 );
w3 = v3/(v1 +v3 );
delta_ecc_comp = w1*delta_ecc_logmar + w3*delta_ecc_ddaf;
end;
if (delta_ecc_logmar ne .) and (delta_ecc_qdaf = .) and (delta_ecc_ddaf = .) and (delta_ecc_ez
ne .) and (delta_ecc_elm = .) then do;
w1 = v1/(v1 + v4 );
w4 = v4/(v1 + v4 );
delta_ecc_comp = w1*delta_ecc_logmar + w4*delta_ecc_ez;
end;
if (delta_ecc_logmar ne .) and (delta_ecc_qdaf = .) and (delta_ecc_ddaf = .) and (delta_ecc_ez =
.) and (delta_ecc_elm ne .) then do;
w1 = v1/(v1 + v5);
w5 = v5/(v1 + v5);
delta_ecc_comp = w1*delta_ecc_logmar + w5*delta_ecc_elm;
end;
if (delta_ecc_logmar =.) and (delta_ecc_qdaf ne .) and (delta_ecc_ddaf ne .) and (delta_ecc_ez =
.) and (delta_ecc_elm = .) then do;
w2 = v2/( v2 +v3 );
w3 = v3/(v2 +v3 );
delta_ecc_comp = w2*delta_ecc_qdaf + w3*delta_ecc_ddaf;
end;
if (delta_ecc_logmar =.) and (delta_ecc_qdaf ne .) and (delta_ecc_ddaf = .) and (delta_ecc_ez ne
.) and (delta_ecc_elm = .) then do;
w2 = v2/( v2 +v4 );
w4 = v4/( v2 +v4 );
delta_ecc_comp = w2*delta_ecc_qdaf + w4*delta_ecc_ez ;
end;
if (delta_ecc_logmar =.) and (delta_ecc_qdaf ne .) and (delta_ecc_ddaf = .) and (delta_ecc_ez =
.) and (delta_ecc_elm ne .) then do;
w2 = v2/(v2 +v5);
w5 = v5/(v2 +v5);
delta_ecc_comp = w2*delta_ecc_qdaf + w5*delta_ecc_elm;
end;
if (delta_ecc_logmar =.) and (delta_ecc_qdaf = .) and (delta_ecc_ddaf ne .) and (delta_ecc_ez ne
.) and (delta_ecc_elm = .) then do;
w3 = v3/(v3 +v4 );
w4 = v4/(v3 +v4);
delta_ecc_comp = w3*delta_ecc_ddaf + w4*delta_ecc_ez ;

```

```

end;
if (delta_ecc_logmar=.) and (delta_ecc_qdaf = .) and (delta_ecc_ddaf ne .) and (delta_ecc_ez =
.) and (delta_ecc_elm ne .) then do;
    w3 = v3/(v3 +v5);
    w5 = v5/(v3 +v5);
    delta_ecc_comp = w3*delta_ecc_ddaf + w5*delta_ecc_elm;
end;
if (delta_ecc_logmar=.) and (delta_ecc_qdaf = .) and (delta_ecc_ddaf = .) and (delta_ecc_ez ne
.) and (delta_ecc_elm ne .) then do;
    w4 = v4/(v4 +v5);
    w5 = v5/(v4 +v5);
    delta_ecc_comp = w4*delta_ecc_ez + w5*delta_ecc_elm;
end;
if (delta_ecc_logmar ne .) and (delta_ecc_qdaf = .) and (delta_ecc_ddaf = .) and (delta_ecc_ez =
.) and (delta_ecc_elm = .) then do;
    delta_ecc_comp = delta_ecc_logmar;
end;
if (delta_ecc_logmar =.) and (delta_ecc_qdaf ne .) and (delta_ecc_ddaf = .) and (delta_ecc_ez =
.) and (delta_ecc_elm = .) then do;
    delta_ecc_comp = delta_ecc_qdaf;
end;
if (delta_ecc_logmar =.) and (delta_ecc_qdaf = .) and (delta_ecc_ddaf ne .) and (delta_ecc_ez =
.) and (delta_ecc_elm = .) then do;
    delta_ecc_comp = delta_ecc_ddaf;
end;
if (delta_ecc_logmar =.) and (delta_ecc_qdaf = .) and (delta_ecc_ddaf = .) and (delta_ecc_ez ne
.) and (delta_ecc_elm = .) then do;
    delta_ecc_comp = delta_ecc_ez;
end;
if (delta_ecc_logmar =.) and (delta_ecc_qdaf = .) and (delta_ecc_ddaf = .) and (delta_ecc_ez =
.) and (delta_ecc_elm ne .) then do;
    delta_ecc_comp = delta_ecc_elm;
end;
output;
run;

data weighting;
set weighting;
if (measurements - measurement > 1) then do;
    output;
end;
if (measurement+1 = measurements) then do;
    output;
    measurement = measurement+1;
    delta_date_diff = delta_date_diff + 1;
    delta_ecc_logmar=.;
    delta_ecc_qdaf=.;
    delta_ecc_ddaf=.;
    delta_ecc_ez=.;
    delta_ecc_elm=.;
    delta_ecc_comp=.;
    output;
    measurement = measurement+1;
    delta_date_diff = delta_date_diff + 1;
    delta_ecc_logmar=.;
    delta_ecc_qdaf=.;
    delta_ecc_ddaf=.;
    delta_ecc_ez=.;
    delta_ecc_elm=.;
    delta_ecc_comp=.;
    output;

```

```

end;

run;

proc mixed data=weighting method=reml covtest;
Class patient_id eye;
Model delta_ecc_comp = delta_date_diff / noint outpm=predmeans_std outp=predind_std solution;
Random delta_date_diff /type=vc subject=patient_id;
Random delta_date_diff /type=vc subject=patient_id*eye;
where delta_ecc_comp ne 0;
run;

data predind_std;
set predind_std;
variance =resid**2;
dummy=1;
run;
proc print data=predind_std;
run;
proc means data=predind_std;
var variance;
output out=test mean=mean_variance;
where delta_date_diff ne 0;
run;

data test;
set test;
residual = sqrt(mean_variance);
dummy=1;
run;

data predind2_std;
merge predind_std test; by dummy;
measurement_new = measurement - (measurements-2);
if ((measurement - measurements) ge -1);
keep patient_id eye pred residual measurement_new delta_ecc_comp;
run;

proc print data=predind2_std;
run;

data one;
set predind2_std;
if measurement_new=1 and eye='OD';
rename delta_ecc_comp=delta_ecc_comp_OD_known;
rename pred=pred_OD_0year;
run;
data one; set one;
keep patient_id residual delta_ecc_comp_OD_known pred_OD_0year;
run;
data two;
set predind2_std;
if measurement_new=1 and eye='OS';
rename delta_ecc_comp=delta_ecc_comp_OS_known;
rename pred=pred_OS_0year;
run;
data two; set two;
keep patient_id delta_ecc_comp_OS_known pred_OS_0year;
run;
data three;
set predind2_std;
if measurement_new=2 and eye='OD';
rename pred=pred_OD_1year;
run;

```

```

data three; set three;
keep patient_id pred_OD_1year;
run;
data four;
set predind2_std;
if measurement_new=2 and eye='OS';
rename pred=pred_OS_1year;
run;
data four; set four;
keep patient_id pred_OS_1year;
run;
data five;
set predind2_std;
if measurement_new=3 and eye='OD';
rename pred=pred_OD_2year;
run;
data five; set five;
keep patient_id pred_OD_2year;
run;
data six;
set predind2_std;
if measurement_new=3 and eye='OS';
rename pred=pred_OS_2year;
run;
data six; set six;
keep patient_id pred_OS_2year;
run;

data patient;
merge one two three four five six; by patient_id;
run;

proc print data=patient;
run;

/*
Start macro: treat random eye. Follow-up: 2 years.
*/

%macro simulate(effect);

proc datasets library=work;
delete results_tot;
run;

%do k=1 %to 10000;
data patient2;
set patient;

random_treat_eye = rand('Bernouilli', 0.5);
if (random_treat_eye = 0) then do;
sim_delta_ecc_untreated_baseline = delta_ecc_comp_OS_known;
sim_delta_ecc_untreated_2year = rand('normal',pred_OS_2year,residual);
if (&effect=0) then effect_size = 0;
else do until (effect_size => rand('uniform') AND effect_size =< (&effect/100)*rand('uniform'));
effect_size = rand ('normal',&effect/100,0.10);
end;
effect_2year = ( pred_OD_2year - pred_OD_0year ) * effect_size;
sim_delta_ecc_treated_baseline = delta_ecc_comp_OD_known;
sim_delta_ecc_treated_2year = rand('normal',pred_OD_2year - effect_2year,residual);
end;

if (random_treat_eye = 1) then do;
sim_delta_ecc_untreated_baseline = delta_ecc_comp_OD_known;

```

```

sim_delta_ecc_untreated_2year = rand('normal',pred_OD_2year,residual);
if (&effect=0) then effect_size = 0;
else do until (effect_size => rand('uniform') AND effect_size =< (&effect/100)*rand('uniform'));
effect_size = rand ('normal',&effect/100,0.10);
end;
effect_2year = ( pred_OS_2year - pred_OS_0year ) * effect_size;
sim_delta_ecc_treated_baseline = delta_ecc_comp_OS_known;
sim_delta_ecc_treated_2year = rand('normal',pred_OS_2year - effect_2year,residual);
end;

prog_ecc_untreated_2year = sim_delta_ecc_untreated_2year - sim_delta_ecc_untreated_baseline;
prog_ecc_treated_2year = sim_delta_ecc_treated_2year - sim_delta_ecc_treated_baseline;
delta_prog_2year = prog_ecc_untreated_2year - prog_ecc_treated_2year;

run;

proc means data=patient2 noprint;
var delta_prog_2year;
output out=results stderr=stderr mean=mean n=n;
run;

%if (&k=1) %then %do;
Data results_tot;
set results;
simulation=&k;
t=abs(mean/stderr);
p = 2*(1 - cdf('T', t, n-1));
run;
%end;
%if (&k>1) %then %do;
Data results;
set results;
simulation=&k;
t=abs(mean/stderr);
p = 2*(1 - cdf('T', t, n-1));
run;
data results_tot;
set results_tot results;
run;
%end;
%end;

Title 'Reduction' &effect '(%)';
proc univariate data=results_tot;
var p mean;
histogram p mean;
run;

data results_tot;
set results_tot;
if (P<0.05 AND mean>0) then reject=1;
else reject=0;
run;

proc freq data=results_tot;
tables reject;
run;
%mend;

/*
Start macro: treat random eye. Follow-up: 1 year.
*/

%macro simulate(effect);

```

```

proc datasets library=work;
  delete results_tot;
run;

%do k=1 %to 10000;
  data patient2;
  set patient;

  random_treat_eye = rand('Bernouilli', 0.5);
  if (random_treat_eye = 0) then do;
    sim_delta_ecc_untreated_baseline = delta_ecc_comp_OS_known;
    sim_delta_ecc_untreated_1year = rand('normal',pred_OS_1year,residual);
    if (&effect=0) then effect_size = 0;
    else do until (effect_size => rand('uniform') AND effect_size =< (&effect/100)*rand('uniform'));
      effect_size = rand ('normal',&effect/100,0.10);
    end;

    effect_1year = ( pred_OD_1year - pred_OD_0year ) * effect_size;
    sim_delta_ecc_treated_baseline = delta_ecc_comp_OD_known;
    sim_delta_ecc_treated_1year = rand('normal',pred_OD_1year - effect_1year,residual);
  end;

  if (random_treat_eye = 1) then do;
    sim_delta_ecc_untreated_baseline = delta_ecc_comp_OD_known;
    sim_delta_ecc_untreated_1year = rand('normal',pred_OD_1year,residual);
    if (&effect=0) then effect_size = 0;
    else do until (effect_size => rand('uniform') AND effect_size =< (&effect/100)*rand('uniform'));
      effect_size = rand ('normal',&effect/100,0.10);
    end;

    effect_1year = ( pred_OS_1year - pred_OS_0year ) * effect_size;
    sim_delta_ecc_treated_baseline = delta_ecc_comp_OS_known;
    sim_delta_ecc_treated_1year = rand('normal',pred_OS_1year - effect_1year,residual);
  end;

  prog_ecc_untreated_1year = sim_delta_ecc_untreated_1year - sim_delta_ecc_untreated_baseline;
  prog_ecc_treated_1year = sim_delta_ecc_treated_1year - sim_delta_ecc_treated_baseline;
  delta_prog_1year = prog_ecc_untreated_1year - prog_ecc_treated_1year;

run;

proc means data=patient2 noprint;
var delta_prog_1year;
output out=results stderr=stderr mean=mean n=n;
run;

%if (&k=1) %then %do;
  Data results_tot;
  set results;
  simulation=&k;
  t=abs(mean/stderr);
  p = 2*(1 - cdf('T', t, n-1));
run;
%end;
%if (&k>1) %then %do;
  Data results;
  set results;
  simulation=&k;
  t=abs(mean/stderr);
  p = 2*(1 - cdf('T', t, n-1));
run;
  data results_tot;
  set results_tot results;
run;
%end;

```

```

%end;

Title 'Reduction' &effect '(%);
proc univariate data=results_tot;
var p mean;
histogram p mean;
run;

data results_tot;
set results_tot;
if (P<0.05 AND mean>0) then reject=1;
else reject=0;
run;

proc freq data=results_tot;
tables reject;
run;
%mend;

/*
Start macro: treat worst eye. Follow-up: 2 years.
*/

%macro simulate(effect);

proc datasets library=work;
delete results_tot;
run;

%do k=1 %to 10000;
data patient2;
set patient;

treat_worst_eye = 0;
if (delta_ecc_comp_OS_known > delta_ecc_comp_OD_known) then treat_worst_eye = 1;
if (treat_worst_eye = 0) then do;
sim_delta_ecc_untreated_baseline = delta_ecc_comp_OS_known;
sim_delta_ecc_untreated_2year = rand('normal',pred_OS_2year,residual);

if (&effect=0) then effect_size = 0;
else do until (effect_size => rand('uniform') AND effect_size =< (&effect/100)*rand('uniform'));
effect_size = rand ('normal',&effect/100,0.10);
end;

effect_2year = ( pred_OD_2year - pred_OD_0year ) * effect_size;
sim_delta_ecc_treated_baseline = delta_ecc_comp_OD_known;
sim_delta_ecc_treated_2year = rand('normal',pred_OD_2year - effect_2year,residual);
end;

if (treat_worst_eye = 1) then do;
sim_delta_ecc_untreated_baseline = delta_ecc_comp_OD_known;
sim_delta_ecc_untreated_2year = rand('normal',pred_OD_2year,residual);

if (&effect=0) then effect_size = 0;
else do until (effect_size => rand('uniform') AND effect_size =< (&effect/100)*rand('uniform'));
effect_size = rand ('normal',&effect/100,0.10);
end;

effect_2year = ( pred_OS_2year - pred_OS_0year ) * effect_size;
sim_delta_ecc_treated_baseline = delta_ecc_comp_OS_known;
sim_delta_ecc_treated_2year = rand('normal',pred_OS_2year - effect_2year,residual);
end;

prog_ecc_untreated_2year = sim_delta_ecc_untreated_2year - sim_delta_ecc_untreated_baseline;
prog_ecc_treated_2year = sim_delta_ecc_treated_2year - sim_delta_ecc_treated_baseline;

```

```

delta_prog_2year = prog_ecc_untreated_2year - prog_ecc_treated_2year;

run;

proc means data=patient2 noprint;
var delta_prog_2year;
output out=results stderr=stderr mean=mean n=n;
run;

%if (&k=1) %then %do;
  Data results_tot;
  set results;
  simulation=&k;
  t=abs(mean/stderr);
  p = 2*(1 - cdf('T', t, n-1));
  run;
%end;
%if (&k>1) %then %do;
  Data results;
  set results;
  simulation=&k;
  t=abs(mean/stderr);
  p = 2*(1 - cdf('T', t, n-1));
  run;
  data results_tot;
  set results_tot results;
  run;
%end;

%end;

Title 'Reduction: ' &effect ' (%)';
proc univariate data=results_tot;
var p mean;
histogram p mean;
run;

data results_tot;
set results_tot;
if (P<0.05 AND mean>0) then reject=1;
else reject=0;
run;

proc freq data=results_tot;
tables reject;
run;
%mend;

/*
Simulate unpaired trial, random eye treated. Follow-up: 2 years.
*/

%macro simulate(effect);

proc datasets library=work;
delete results_tot;
run;

%do k=1 %to 10000;
  proc surveyselect noprint data=patient out=split samprate=.5 outall;
  run;
  data treated_patients untreated_patients;
  set split;
  if selected = 1 then
  output treated_patients;

```

```

else output untreated_patients;
run;

data untreated_patients;
set untreated_patients;

treated=0;
sim_delta_ecc_OS_baseline = delta_ecc_comp_OS_known;
sim_delta_ecc_OS_2year = rand('normal',pred_OS_2year,residual);
sim_delta_ecc_OD_baseline = delta_ecc_comp_OD_known;
sim_delta_ecc_OD_2year = rand('normal',pred_OD_2year,residual);
run;

data treated_patients;
set treated_patients;

treated=1;

if (&effect=0) then effect_size = 0;
else do until (effect_size => rand('uniform') AND effect_size =< (&effect/100)*rand('uniform'));
effect_size = rand ('normal',&effect/100,0.10);
end;
effect_2year = ( pred_OD_2year - pred_OD_0year ) * effect_size;
sim_delta_ecc_OD_baseline = delta_ecc_comp_OD_known;
sim_delta_ecc_OD_2year = rand('normal',pred_OD_2year - effect_2year,residual);
effect_2year = ( pred_OS_2year - pred_OS_0year ) * effect_size;
sim_delta_ecc_OS_baseline = delta_ecc_comp_OS_known;
sim_delta_ecc_OS_2year = rand('normal',pred_OS_2year - effect_2year,residual);
run;

data patient2;
set untreated_patients treated_patients;
prog_ecc_OD_2year = sim_delta_ecc_OD_2year - sim_delta_ecc_OD_baseline;
prog_ecc_OS_2year = sim_delta_ecc_OS_2year - sim_delta_ecc_OS_baseline;
prog_ecc_ODS_2year = mean(prog_ecc_OD_2year,prog_ecc_OS_2year);
run;

proc ttest data=patient2;
class treated;
var prog_ecc_ODS_2year;
ods output Ttests=ttest_output Statistics=stats;
run;

data stats1;
set stats;
if class='0';
id=1;
rename mean=mean_untreated;
run;
data stats1;
set stats1;
keep id mean_untreated;
run;
data stats2;
set stats;
if class='1';
id=1;
rename mean=mean_treated;
run;
data stats2;
set stats2;
keep id mean_treated;
run;
data ttest2;

```

```

set ttest_output;
if method='Pooled';
id=1;
keep id probt;
run;
data results;
merge stats1 stats2 ttest2;
difference = mean_untreated - mean_treated;
reject=0;
if (difference>0) and (probt < 0.05) then do;
    reject=1;
end;
by id;
drop id;
run;

%if (&k=1) %then %do;
    Data results_tot;
    set results;
    simulation=&k;
    run;
%end;
%if (&k>1) %then %do;
    Data results;
    set results;
    simulation=&k;
    run;
    data results_tot;
    set results_tot results;
    run;
%end;
%end;

Title 'Reduction' &effect '(%>';
proc univariate data=results_tot;
var probt difference;
histogram probt difference;
run;

proc freq data=results_tot;
tables reject;
run;
%mend;

%simulate(0);
%simulate(5);
%simulate(10);
%simulate(15);
%simulate(20);
%simulate(25);
%simulate(30);
%simulate(35);
%simulate(40);
%simulate(45);
%simulate(50);
%simulate(55);
%simulate(60);
%simulate(65);
%simulate(70);
%simulate(75);
%simulate(80);
%simulate(85);
%simulate(90);
%simulate(95);
%simulate(100);

```
